# Supplementary material for: Solid-phase hetero epitaxial growth of α-phase formamidinium perovskite
Source: PubMed Central journal article supplement (PMC7608657; doi:10.1038/s41467-020-19237-3), 2020-11-02
Supplement: 41467_2020_19237_MOESM3_ESM.pdf [file 41467_2020_19237_MOESM3_ESM.pdf]

## Solar Cells Reporting Summary

Nature Research wishes to improve the reproducibility of the work that we publish. This form is intended for publication with all accepted papers reporting the characterization of photovoltaic devices and provides structure for consistency and transparency in reporting. Some list items might not apply to an individual manuscript, but all fields must be completed for clarity.

For further information on Nature Research policies, including our [data availability policy](#), see [Authors & Referees](#).

### ü Experimental design

**Please check: are the following details reported in the manuscript?**

#### 1. Dimensions

|                                          |                                                                        |                |
|------------------------------------------|------------------------------------------------------------------------|----------------|
| Area of the tested solar cells           | <input checked="" type="checkbox"/> Yes<br><input type="checkbox"/> No | Method section |
| Method used to determine the device area | <input checked="" type="checkbox"/> Yes<br><input type="checkbox"/> No | Method section |

#### 2. Current-voltage characterization

|                                                                                                                                                                                                |                                                                        |                                                                                            |
|------------------------------------------------------------------------------------------------------------------------------------------------------------------------------------------------|------------------------------------------------------------------------|--------------------------------------------------------------------------------------------|
| Current density-voltage (J-V) plots in both forward and backward direction                                                                                                                     | <input type="checkbox"/> Yes<br><input checked="" type="checkbox"/> No | Steady-state efficiency measurement was reported to ensure accurate efficiency measurement |
| Voltage scan conditions<br><i>For instance: scan direction, speed, dwell times</i>                                                                                                             | <input checked="" type="checkbox"/> Yes<br><input type="checkbox"/> No | Method section                                                                             |
| Test environment<br><i>For instance: characterization temperature, in air or in glove box</i>                                                                                                  | <input checked="" type="checkbox"/> Yes<br><input type="checkbox"/> No | Method section                                                                             |
| Protocol for preconditioning of the device before its characterization                                                                                                                         | <input type="checkbox"/> Yes<br><input checked="" type="checkbox"/> No | No preconditioning was applied.                                                            |
| Stability of the J-V characteristic<br><i>Verified with time evolution of the maximum power point or with the photocurrent at maximum power point; see <a href="#">ref. 7</a> for details.</i> | <input checked="" type="checkbox"/> Yes<br><input type="checkbox"/> No | Steady-state efficiency measurement was reported.                                          |

#### 3. Hysteresis or any other unusual behaviour

|                                                                           |                                                                        |                     |
|---------------------------------------------------------------------------|------------------------------------------------------------------------|---------------------|
| Description of the unusual behaviour observed during the characterization | <input type="checkbox"/> Yes<br><input checked="" type="checkbox"/> No | no unusual behavior |
| Related experimental data                                                 | <input type="checkbox"/> Yes<br><input checked="" type="checkbox"/> No | no unusual behavior |

#### 4. Efficiency

|                                                                                                                                 |                                                                        |                |
|---------------------------------------------------------------------------------------------------------------------------------|------------------------------------------------------------------------|----------------|
| External quantum efficiency (EQE) or incident photons to current efficiency (IPCE)                                              | <input checked="" type="checkbox"/> Yes<br><input type="checkbox"/> No | Figure 4       |
| A comparison between the integrated response under the standard reference spectrum and the response measure under the simulator | <input checked="" type="checkbox"/> Yes<br><input type="checkbox"/> No | Figure 4       |
| For tandem solar cells, the bias illumination and bias voltage used for each subcell                                            | <input type="checkbox"/> Yes<br><input checked="" type="checkbox"/> No | not applicable |

#### 5. Calibration

|                                                                         |                                                                        |                |
|-------------------------------------------------------------------------|------------------------------------------------------------------------|----------------|
| Light source and reference cell or sensor used for the characterization | <input checked="" type="checkbox"/> Yes<br><input type="checkbox"/> No | Method section |
| Confirmation that the reference cell was calibrated and certified       | <input checked="" type="checkbox"/> Yes<br><input type="checkbox"/> No | Method section |

- Calculation of spectral mismatch between the reference cell and the devices under test  
 Yes It was reflected to the calibration processes.  
 No
6. Mask/aperture
- Size of the mask/aperture used during testing  
 Yes Method section  
 No
- Variation of the measured short-circuit current density with the mask/aperture area  
 Yes one kind of aperture was used  
 No
7. Performance certification
- Identity of the independent certification laboratory that confirmed the photovoltaic performance  
 Yes It was not measured in the independent certification laboratory.  
 No
- A copy of any certificate(s)  
*Provide in Supplementary Information*  
 Yes It was not measured in the independent certification laboratory.  
 No
8. Statistics
- Number of solar cells tested  
 Yes Only the best performing device was reported.  
 No
- Statistical analysis of the device performance  
 Yes Only the best performing device was reported.  
 No
9. Long-term stability analysis
- Type of analysis, bias conditions and environmental conditions  
*For instance: illumination type, temperature, atmosphere humidity, encapsulation method, preconditioning temperature*  
 Yes Figure 4 and Method section  
 No
